# Supplementary material
Source: publisher figshare collection journal article supplement (https://tandf.figshare.com/ndownloader/files/16249130)
Supplement: Supplementary file 1 [file 16249130]

## Supplemental Figures

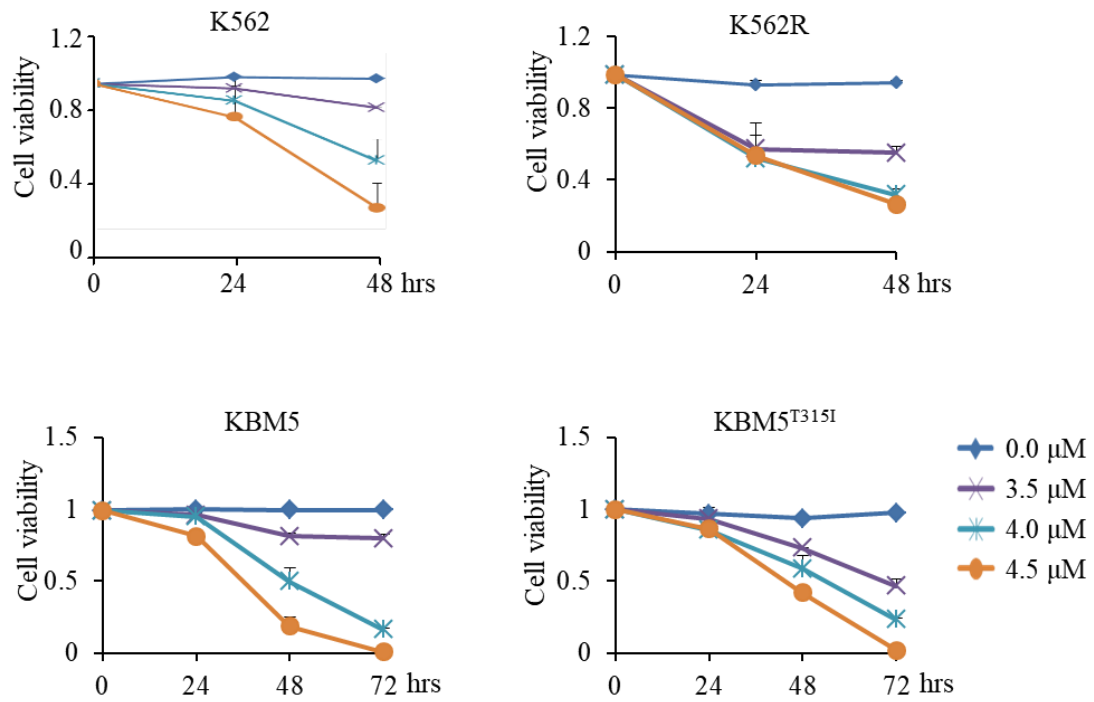

**Figure S1 QC reduces cell viability in CML cell lines.** CML cell lines were treated with different concentrations of QC at different times and cell viability was measured by the CCK-8 assay.

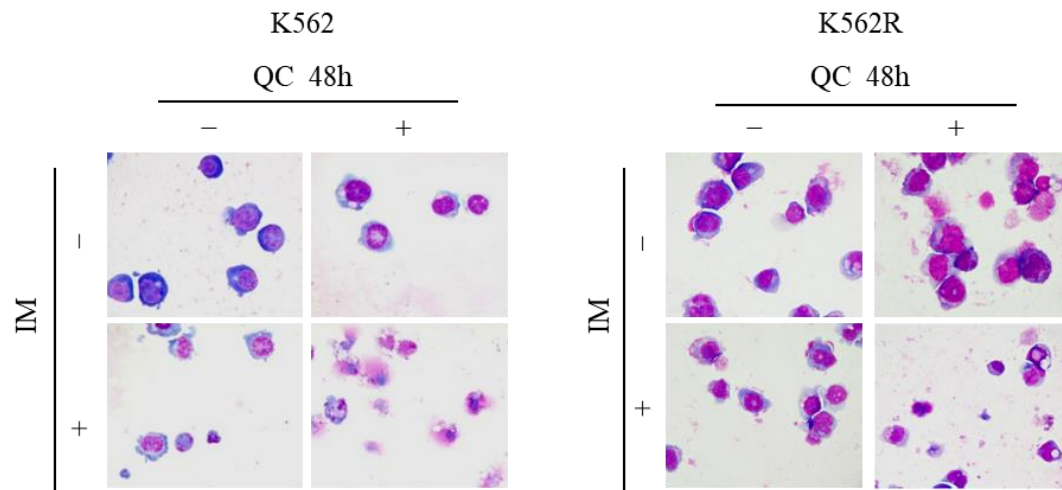

**Figure S2 Morphological staining of CML cells after QC and IM treatment.** CML cell lines were treated with QC (4  $\mu$ M) and IM (0.4  $\mu$ M) 48 hours and cell morphology was measured by Giemsa staining. Image magnification: 400 $\times$ .
